# Supplementary material for: Nitro-oleic acid downregulates lipoprotein-associated phospholipase A2 expression via the p42/p44 MAPK and NFκB pathways
Source: PubMed Central journal article supplement — Sci Rep. 2014 May 9;4:4905. doi: 10.1038/srep04905 (PMC4014883; doi:10.1038/srep04905), 2014-05-09
Supplement: srep04905-s1.pdf [file srep04905-s1.pdf]

1                   **Nitro-oleic acid downregulates lipoprotein-associated**  
2 **phospholipase A2 expression via the p42/p44 MAPK and NFκB pathways**

3  
4 Gangqi Wang<sup>1§</sup>; Yuan Ji<sup>1§</sup>; Zhuang Li<sup>§</sup>; Xiaolei Han<sup>§</sup>; Nannan Guo<sup>§</sup>; Qi Song<sup>§</sup>;  
5 Longquan Quan<sup>§</sup>; Tiedong Wang<sup>§</sup>; Wenyu Han<sup>Ω</sup>; Daxin Pang<sup>§</sup>; Hongsheng  
6 Ouyang<sup>§</sup>; Xiaochun Tang<sup>\*§</sup>.

7 **Affiliations:** § Jilin Provincial Key Laboratory of Animal Embryo Engineering,  
8 College of Animal Sciences, Jilin University.

9                   Ω College of Veterinary Medicine, Jilin University.

10                  1 These authors contributed equally to this work.

11                  \*Correspondence to, Xiaochun T. 5333#, Xi'an Road, Changchun  
12 130062, China. Email: [xiaochuntang@jlu.edu.cn](mailto:xiaochuntang@jlu.edu.cn)

13 **Address:** 5333#, Xi'an Road, Changchun 130062, China; Tel.: (86)  
14 431-87836175;

15                  Fax: (86) 431-87980131.

16

17 **Supplementary figures**

18

19 **Supplementary figure S1**

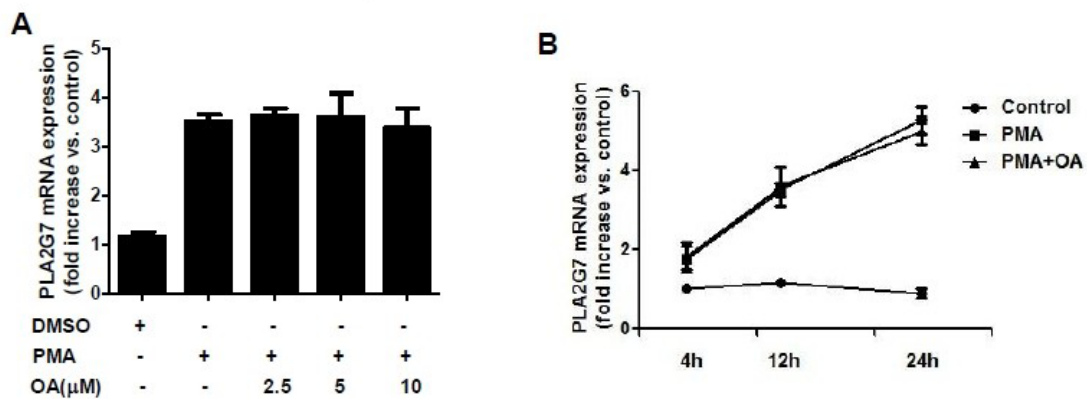

20

21

22

23

24

Figure S1. THP-1 cells were incubated with OA at the indicated concentrations for 1 h and then stimulated with PMA (0.05  $\mu$ M). A, the relative Lp-PLA2 mRNA expression levels were determined after 12 h at different concentrations. B, the relative Lp-PLA2 mRNA expression levels were determined at the concentration of 5  $\mu$ M in different hours.

25 **Supplementary figure S2**

26

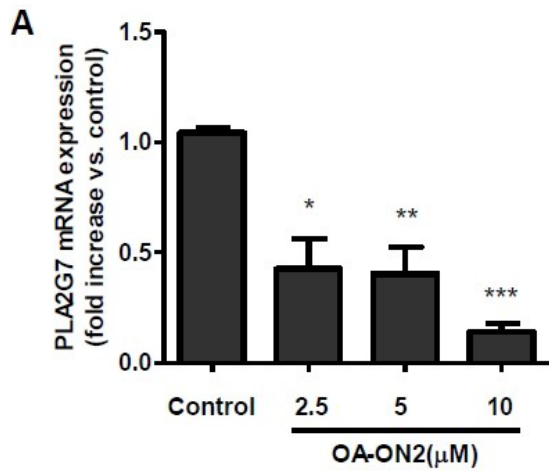

27

28

29

30

Figure S2. OA-NO<sub>2</sub> downregulates Lp-PLA<sub>2</sub> expression in HUVECs. HUVECs were incubated with OA-NO<sub>2</sub> at the indicated concentrations for 12 h without PMA. Then, the relative Lp-PLA<sub>2</sub> mRNA expression levels were determined.

31 **Supplementary figure S3**

32

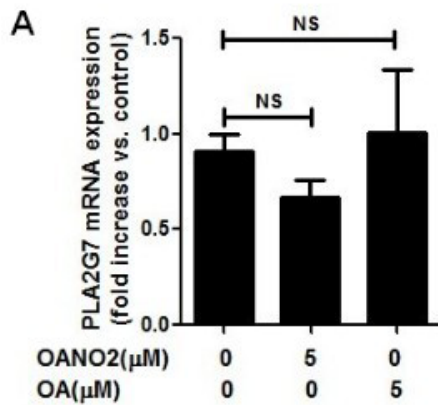

33

34 Figure S3. Peripheral blood  
35 mononuclear cells isolated from WT pigs  
36 were incubated with OA-NO<sub>2</sub> and OA at  
37 the indicated concentrations for 12 h,  
38 and then the relative Lp-PLA<sub>2</sub> mRNA  
39 expression levels were determined.

38

39

40

41

42

43

44 **Supplementary figure S4**

45

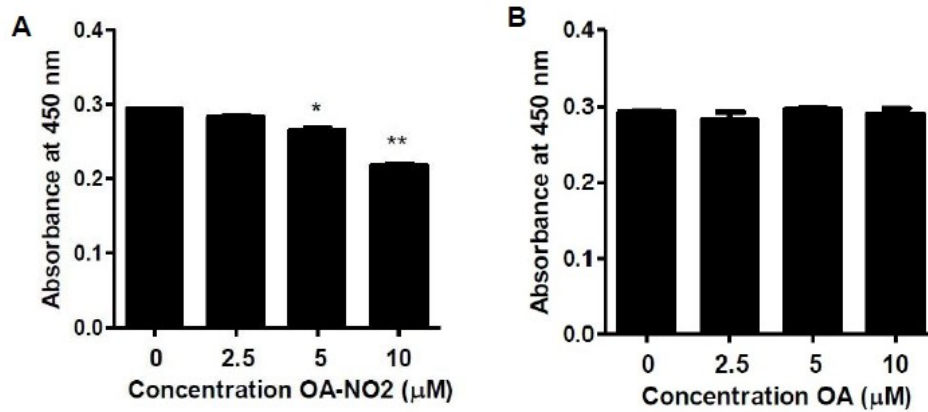

46

47

48

Figure S4. The cell viability affected by the addition of OA-NO<sub>2</sub> and OA. Approximately 2500 THP-1 cells/well were plated in 96-well plate with 100  $\mu\text{L}$  medium with OA-NO<sub>2</sub> or OA for 12h, then, the CCK-8 was added into the medium and The relative cell viability determined by a 96-well plate reader at an absorbance value of 450 nm after 4h.

49 **Supplementary figure S5**  
 50

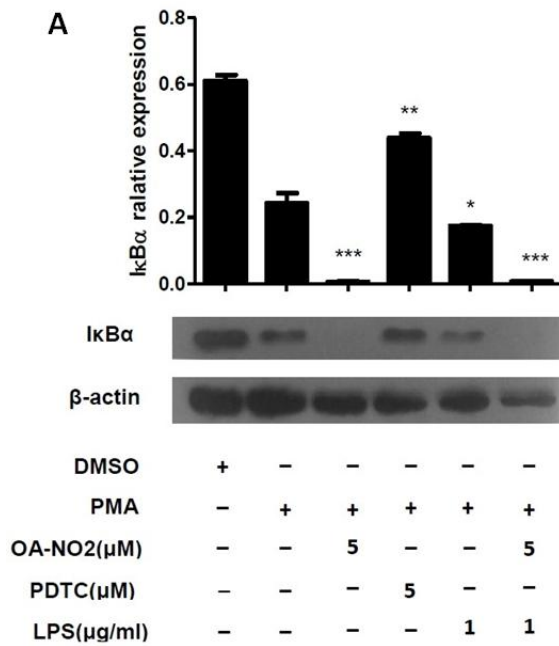

51  
 52 Figure S5. The effect of OA-NO<sub>2</sub> on the  
 53 classical NFκB pathway. THP-1 cells were  
 54 incubated with OA-NO<sub>2</sub>, PDTC and LPS at  
 the indicated concentrations for 1 h and then  
 stimulated with PMA (0.05 μM). The  
 degradation of IκBα were determined after  
 stimulation with PMA for 24 h
